# Supplementary material for: U12-type Spliceosomal Introns of Insecta
Source: PubMed Central journal article supplement — Int J Biol Sci. 2012 Feb 17;8(3):344–52. doi: 10.7150/ijbs.3933 (PMC3291851; doi:10.7150/ijbs.3933), 2012-02-17
Supplement: ijbsv08p0344s1.pdf [file ijbsv08p0344s1.pdf]

# SUPPLEMENTARY MATERIALS

## U12-type Spliceosomal Introns Of Insecta

Jessin Janice, et al.

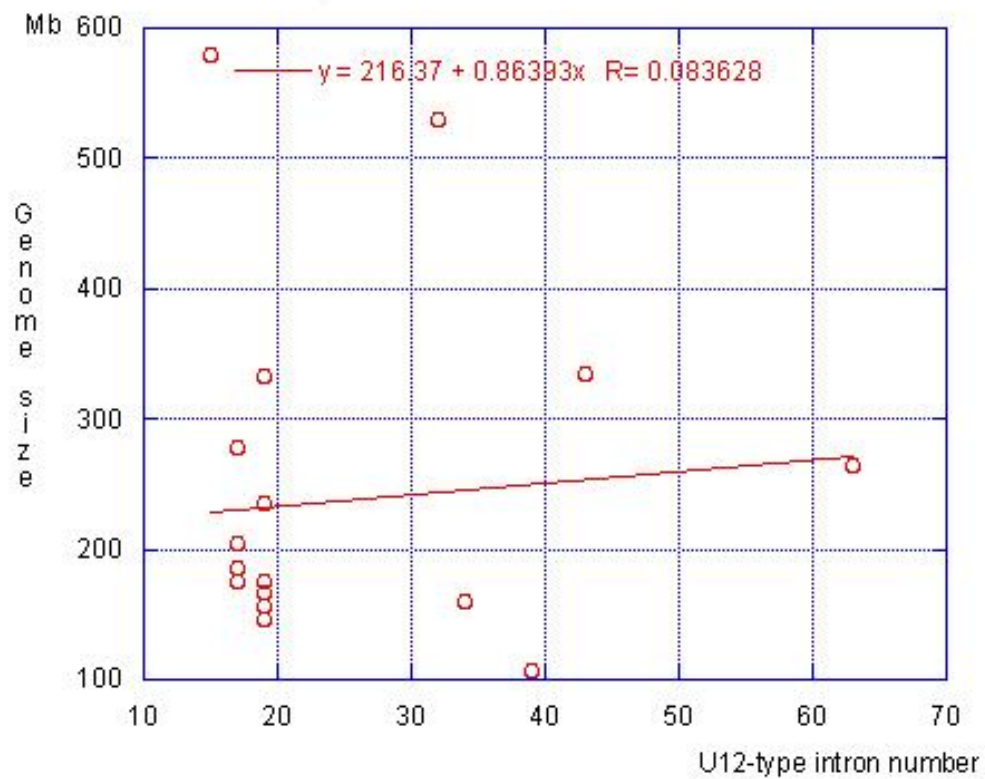

**Figure S1. Scatter plot of correlation between genome size and number of U12-type introns.**

| Gene Id          | <i>Drosophila simulans</i> (19) | <i>Drosophila sechellia</i> (19) | <i>Drosophila melanogaster</i> (19) | <i>Drosophila erecta</i> (19) | <i>Drosophila yakuba</i> (19) | <i>Drosophila ananassae</i> (17) | <i>Drosophila pseudoobscura</i> (19) | <i>Drosophila persimilis</i> (17) | <i>Drosophila willistoni</i> (17) | <i>Drosophila mojavensis</i> (19) | <i>Drosophila virilis</i> (19) | <i>Drosophila grimshawi</i> (19) | <i>Aedes aegypti</i> (17) | <i>Culex quinquefasciatus</i> (15) | <i>Anopheles gambiae</i> (17) | <i>Bombyx mori</i> (32) | <i>Tribolium castaneum</i> (33) | <i>Apis mellifera</i> (63) | <i>Nasonia vitripennis</i> (46) | <i>Pediculus humanus</i> (39) | <i>Homo sapiens</i> (60) |
|------------------|---------------------------------|----------------------------------|-------------------------------------|-------------------------------|-------------------------------|----------------------------------|--------------------------------------|-----------------------------------|-----------------------------------|-----------------------------------|--------------------------------|----------------------------------|---------------------------|------------------------------------|-------------------------------|-------------------------|---------------------------------|----------------------------|---------------------------------|-------------------------------|--------------------------|
| 1 CG6323         |                                 |                                  |                                     |                               |                               |                                  |                                      |                                   |                                   |                                   |                                |                                  |                           |                                    |                               |                         |                                 |                            |                                 |                               |                          |
| 2 CG8408         |                                 |                                  |                                     |                               |                               |                                  |                                      |                                   |                                   |                                   |                                |                                  |                           |                                    |                               |                         |                                 |                            |                                 |                               |                          |
| 3 CG17912        |                                 |                                  |                                     |                               |                               |                                  |                                      |                                   |                                   |                                   |                                |                                  |                           |                                    |                               |                         |                                 |                            |                                 |                               |                          |
| 4 CG32705        |                                 |                                  |                                     |                               |                               |                                  |                                      |                                   |                                   |                                   |                                |                                  |                           |                                    |                               |                         |                                 |                            |                                 |                               |                          |
| 5 CG33108        |                                 |                                  |                                     |                               |                               |                                  |                                      |                                   |                                   |                                   |                                |                                  |                           |                                    |                               |                         |                                 |                            |                                 |                               |                          |
| 6 CG7892         |                                 |                                  |                                     |                               |                               |                                  |                                      |                                   |                                   |                                   |                                |                                  |                           |                                    |                               |                         |                                 |                            |                                 |                               |                          |
| 7 CG15735        |                                 |                                  |                                     |                               |                               |                                  |                                      |                                   |                                   |                                   |                                |                                  |                           |                                    |                               |                         |                                 |                            |                                 |                               |                          |
| 8 CG3294         |                                 |                                  |                                     |                               |                               |                                  |                                      |                                   |                                   |                                   |                                |                                  |                           |                                    |                               |                         |                                 |                            |                                 |                               |                          |
| 9 CG16941        |                                 |                                  |                                     |                               |                               |                                  |                                      |                                   |                                   |                                   |                                |                                  |                           |                                    |                               |                         |                                 |                            |                                 |                               |                          |
| 10 CG11839       |                                 |                                  |                                     |                               |                               |                                  |                                      |                                   |                                   |                                   |                                |                                  |                           |                                    |                               |                         |                                 |                            |                                 |                               |                          |
| 11 CG11328       |                                 |                                  |                                     |                               |                               |                                  |                                      |                                   |                                   |                                   |                                |                                  |                           |                                    |                               |                         |                                 |                            |                                 |                               |                          |
| 12 CG18177       |                                 |                                  |                                     |                               |                               |                                  |                                      |                                   |                                   |                                   |                                |                                  |                           |                                    |                               |                         |                                 |                            |                                 |                               |                          |
| 13 CG7736        |                                 |                                  |                                     |                               |                               |                                  |                                      |                                   |                                   |                                   |                                |                                  |                           |                                    |                               |                         |                                 |                            |                                 |                               |                          |
| 14 CG17228       |                                 |                                  |                                     |                               |                               |                                  |                                      |                                   |                                   |                                   |                                |                                  |                           |                                    |                               |                         |                                 |                            |                                 |                               |                          |
| 15 CG15081       |                                 |                                  |                                     |                               |                               |                                  |                                      |                                   |                                   |                                   |                                |                                  |                           |                                    |                               |                         |                                 |                            |                                 |                               |                          |
| 16 CG3427        |                                 |                                  |                                     |                               |                               |                                  |                                      |                                   |                                   |                                   |                                |                                  |                           |                                    |                               |                         |                                 |                            |                                 |                               |                          |
| 17 CG11984       |                                 |                                  |                                     |                               |                               |                                  |                                      |                                   |                                   |                                   |                                |                                  |                           |                                    |                               |                         |                                 |                            |                                 |                               |                          |
| 18 CG15899       |                                 |                                  |                                     |                               |                               |                                  |                                      |                                   |                                   |                                   |                                |                                  |                           |                                    |                               |                         |                                 |                            |                                 |                               |                          |
| 19 100578899 (A) |                                 |                                  |                                     |                               |                               |                                  |                                      |                                   |                                   |                                   |                                |                                  |                           |                                    |                               |                         |                                 |                            |                                 |                               |                          |
| 20 100578899 (B) |                                 |                                  |                                     |                               |                               |                                  |                                      |                                   |                                   |                                   |                                |                                  |                           |                                    |                               |                         |                                 |                            |                                 |                               |                          |
| 21 724128        |                                 |                                  |                                     |                               |                               |                                  |                                      |                                   |                                   |                                   |                                |                                  |                           |                                    |                               |                         |                                 |                            |                                 |                               |                          |
| 22 413727        |                                 |                                  |                                     |                               |                               |                                  |                                      |                                   |                                   |                                   |                                |                                  |                           |                                    |                               |                         |                                 |                            |                                 |                               |                          |
| 23 411859        |                                 |                                  |                                     |                               |                               |                                  |                                      |                                   |                                   |                                   |                                |                                  |                           |                                    |                               |                         |                                 |                            |                                 |                               |                          |
| 24 410875        |                                 |                                  |                                     |                               |                               |                                  |                                      |                                   |                                   |                                   |                                |                                  |                           |                                    |                               |                         |                                 |                            |                                 |                               |                          |
| 25 410604        |                                 |                                  |                                     |                               |                               |                                  |                                      |                                   |                                   |                                   |                                |                                  |                           |                                    |                               |                         |                                 |                            |                                 |                               |                          |
| 26 100578715     |                                 |                                  |                                     |                               |                               |                                  |                                      |                                   |                                   |                                   |                                |                                  |                           |                                    |                               |                         |                                 |                            |                                 |                               |                          |
| 27 410740        |                                 |                                  |                                     |                               |                               |                                  |                                      |                                   |                                   |                                   |                                |                                  |                           |                                    |                               |                         |                                 |                            |                                 |                               |                          |
| 28 551396        |                                 |                                  |                                     |                               |                               |                                  |                                      |                                   |                                   |                                   |                                |                                  |                           |                                    |                               |                         |                                 |                            |                                 |                               |                          |
| 29 411230        |                                 |                                  |                                     |                               |                               |                                  |                                      |                                   |                                   |                                   |                                |                                  |                           |                                    |                               |                         |                                 |                            |                                 |                               |                          |
| 30 410174        |                                 |                                  |                                     |                               |                               |                                  |                                      |                                   |                                   |                                   |                                |                                  |                           |                                    |                               |                         |                                 |                            |                                 |                               |                          |
| 31 408796        |                                 |                                  |                                     |                               |                               |                                  |                                      |                                   |                                   |                                   |                                |                                  |                           |                                    |                               |                         |                                 |                            |                                 |                               |                          |
| 32 724489        |                                 |                                  |                                     |                               |                               |                                  |                                      |                                   |                                   |                                   |                                |                                  |                           |                                    |                               |                         |                                 |                            |                                 |                               |                          |
| 33 551854        |                                 |                                  |                                     |                               |                               |                                  |                                      |                                   |                                   |                                   |                                |                                  |                           |                                    |                               |                         |                                 |                            |                                 |                               |                          |



**Table S1. Insect genes harboring U12-type introns used in the study.**

| Seed Genome                    | Gene number | Annotation Symbol / Gene ID | Termini | Name and Function                                                                                                                              | Source     |
|--------------------------------|-------------|-----------------------------|---------|------------------------------------------------------------------------------------------------------------------------------------------------|------------|
| <i>Drosophila melanogaster</i> | 1           | CG6323                      | GT-AG   | <i>Tsp97E</i> (Tetraspanin 97E); <i>TSPAN13</i> (tetraspanin 13)                                                                               | U12DB      |
|                                | 2           | CG8408                      | GT-AG   | <i>TMEM41B</i> (Transmembrane protein 41B)                                                                                                     | U12DB      |
|                                | 3           | CG17912                     | GT-AG   | <i>ZNF207</i> (Zinc finger protein 207)                                                                                                        | U12DB      |
|                                | 4           | CG32705                     | GT-AG   | <i>ZDHHC8</i> (zinc finger, DHHC-type containing 8)                                                                                            | U12DB      |
|                                | 5           | CG33108                     | GT-AG   | <i>C19orf54</i> (chromosome 19 open reading frame 54)                                                                                          | Lin et al. |
|                                | 6           | CG7892                      | GT-AG   | <i>nmo</i> (nemo); <i>NLK</i> (nemo-like kinase)                                                                                               | U12DB      |
|                                | 7           | CG15735                     | GT-AG   | <i>LSM12</i> , RNA-processing, Lsm domain                                                                                                      | Lin et al. |
|                                | 8           | CG3294                      | GT-AG   | <i>ZRSR2</i> (zinc finger (CCCH type), RNA-binding motif and serine/arginine rich 2), <i>URP</i> ; <i>U2AF</i> small subunit related protein ; | U12DB      |
|                                | 9           | CG16941                     | GC-AG   | <i>SF3A1</i> (splicing factor 3a, subunit 1, 120kDa)                                                                                           | U12DB      |
|                                | 10          | CG11839                     | AT-AC   | <i>CCDC16</i> (coiled-coil domain containing 16); <i>ZNF830</i> (zinc finger protein 830)                                                      | U12DB      |
|                                | 11          | CG11328                     | AT-AC   | <i>Nhe3</i> ; <i>SLC9A7</i> (solute carrier family 9 (sodium/hydrogen exchanger), member 7)                                                    | U12DB      |
|                                | 12          | CG18177                     | AT-AC   | FLJ14154 hypothetical protein                                                                                                                  | U12DB      |
|                                | 13          | CG7736                      | AT-AC   | <i>Syx6</i> (Syntaxin 6); <i>STX6</i> (syntaxin 6)                                                                                             | U12DB      |
|                                | 14          | CG17228                     | AT-AC   | <i>pros</i> (prospero); <i>PROX1</i> (prospero homeobox 1)                                                                                     | U12DB      |
|                                | 15          | CG15081                     | AT-AC   | <i>l(2)03709</i> (lethal (2) 03709); <i>PHB2</i> (prohibitin 2)                                                                                | U12DB      |
|                                | 16          | CG3427                      | AT-AC   | <i>Epac</i> ; <i>RAPGEF3</i> (Rap guanine nucleotide exchange factor (GEF)3 )                                                                  | U12DB      |
|                                | 17          | CG11984                     | AT-AC   | <i>KCMF1</i> (potassium channel modulatory factor 1)                                                                                           | U12DB      |
|                                | 18          | CG15899                     | AT-AC   | <i>Ca-v1T</i> , calcium channel activity                                                                                                       | U12DB      |

|    |               |       |                                                                                                                                                       |              |
|----|---------------|-------|-------------------------------------------------------------------------------------------------------------------------------------------------------|--------------|
| 19 | 100578899 (A) | GT-AG | <i>Ca-a1D</i> (Ca <sup>2+</sup> -channel protein $\alpha$ 1 subunit D); <i>CACNA1D</i> (calcium channel, voltage-dependent, L type, alpha 1D subunit) | U12DB        |
| 20 | 100578899 (B) | GT-AG | <i>Ca-a1D</i> (Ca <sup>2+</sup> -channel protein $\alpha$ 1 subunit D); <i>CACNA1D</i> (calcium channel, voltage-dependent, L type, alpha 1D subunit) | U12DB        |
| 21 | 724128        | AT-AC | <i>p16-ARC</i> (ARP2/3 complex 16 kDa subunit) (p16-ARC)                                                                                              | Mount et al. |
| 22 | 413727        | GT-AG | <i>pit / pitchoune</i> ( ATP-dependent RNA helicase activity)                                                                                         | Mount et al. |
| 23 | 411859        | GT-AG | <i>Pten</i> ( PDZ domain binding )                                                                                                                    | U12DB        |
| 24 | 410875        | GT-AG | CG6712 (RNA binding)                                                                                                                                  | U12DB        |
| 25 | 410604        | GT-AG | <i>tws/ twins</i> (protein serine/threonine phosphatase activity)                                                                                     | U12DB        |
| 26 | 100578715     | GT-AG | <i>wls/ wntless</i> (Wnt receptor signaling pathway)                                                                                                  | U12DB        |
| 27 | 410740        | GT-AG | CG15814 (protein/ zinc ion binding)                                                                                                                   | U12DB        |
| 28 | 551396        | GT-AG | <i>lethal (1)</i> G0095 (binding)                                                                                                                     | U12DB        |
| 29 | 411230        | GT-AG | <i>Zpr1</i> (protein/ zinc ion binding)                                                                                                               | U12DB        |
| 30 | 410174        | GT-AG | <i>Cyclin T</i> (cyclin-dependent protein kinase regulator activity)                                                                                  | U12DB        |
| 31 | 408796        | GT-AG | CG5625 (biological process vesicle-mediated transport)                                                                                                | U12DB        |
| 32 | 724489        | GT-AG | CG15735 (ubiquitin like )                                                                                                                             | U12DB        |
| 33 | 551854        | GT-AG | <i>PpD3</i> - Protein phosphatase D3(protein serine/threonine phosphatase activity; metal ion binding)                                                | U12DB        |
| 34 | 724718        | GT-AG | <i>Ry- Rosy</i> (xanthine dehydrogenase activity; iron-sulfur cluster binding; electron carrier activity)                                             | Mount et al. |
| 35 | 551248        | GT-AG | CG14222, acyl-CoA N-acyltransferase activity; N-acetyltransferase activity                                                                            | U12DB        |

|    |        |       |                                                                                                                             |              |
|----|--------|-------|-----------------------------------------------------------------------------------------------------------------------------|--------------|
| 36 | 552330 | GT-AG | <i>Nhe3</i> - Na <sup>+</sup> /H <sup>+</sup> hydrogen exchanger 3 (sodium:hydrogen antiporter activity)                    | U12DB        |
| 37 | 727074 | AT-AC | <i>Spase 22/23</i> Spase 22/23-subunit (Peptidases activity)                                                                | U12DB        |
| 38 | 408842 | GT-AG | <i>Trn</i> - Transportin (protein transmembrane transporter activity)                                                       | Mount et al. |
| 39 | 409134 | GT-AG | <i>Tcp1-like</i> (hydrogen-exporting ATPase activity, phosphorylative mechanism; ATP binding)                               | U12DB        |
| 40 | 726009 | GT-AG | CG5941 (protein binding; zinc ion binding)                                                                                  | U12DB        |
| 41 | 410953 | GT-AG | <i>Mio-Mlx</i> interactor(transcription factor activity)                                                                    | U12DB        |
| 42 | 408267 | GT-AG | <i>Tomosyn</i> (syntaxin-1 binding)                                                                                         | U12DB        |
| 43 | 413494 | GT-AG | CG5608 (binding)                                                                                                            | U12DB        |
| 44 | 411113 | GT-AG | CG5594 (potassium:chloride symporter activity; amino acid transmembrane transporter activity)                               | U12DB        |
| 45 | 412817 | GT-AG | CG32164 (protein transporter activity; binding)                                                                             | U12DB        |
| 46 | 412731 | GT-AG | CG3573 (inositol-polyphosphate 5-phosphatase activity; inositol trisphosphate phosphatase activity.)                        | U12DB        |
| 47 | 410032 | GT-AG | <i>Trxr-1</i> - Thioredoxin reductase-1(thioredoxin-disulfide reductase activity; antioxidant activity; NADPH / FADbinding) | Mount et al. |
| 48 | 726358 | GT-AG | <i>htt</i> - huntingtin(microtubule binding; protein binding; binding)                                                      | Mount et al. |
| 49 | 410266 | GT-AG | <i>RfC3</i> - Replication factor C subunit 3 (DNA binding; ATP binding; DNA clamp loader activity)                          | Mount et al. |
| 50 | 727025 | GT-AG | <i>DISC1</i> - Disrupted in schizophrenia 1 protein                                                                         | U12DB        |
| 51 | 409348 | GT-AG | <i>l(2)gl</i> - lethal (2) giant larvae(myosin II binding; myosin binding; protein                                          | Mount et al. |

|    |           |       |                                                                                                         |              |
|----|-----------|-------|---------------------------------------------------------------------------------------------------------|--------------|
|    |           |       | binding)                                                                                                |              |
| 52 | 410099    | AT-AC | unknown                                                                                                 | Mount et al. |
| 53 | 412332    | GT-AG | <i>MED23</i> - Mediator complex subunit 23(RNA polymerase II transcription mediator activity)           | Mount et al. |
| 54 | 552115    | AT-AC | <i>FK506-bp2</i> - FK506-binding protein 2(FK506 binding; peptidyl-prolyl cis-trans isomerase activity) | Mount et al. |
| 55 | 551712    | GT-AG | CG8446 (lipoyltransferase activity)                                                                     | Mount et al. |
| 56 | 552764    | GT-AG | CG7414 (regulation of translation; ribosome assembly; proteolysis)                                      | Mount et al. |
| 57 | 552776    | GT-AG | <i>Srp68</i> (7S RNA binding; mRNA binding)                                                             | Mount et al. |
| 58 | 411969    | GT-AG | <i>rump</i> - rumpelstiltskin (mRNA 3'-UTR binding; mRNA binding; nucleotide binding)                   | Mount et al. |
| 59 | 412775    | GT-AG | <i>kl-2</i> - male fertility factor kl2                                                                 | Mount et al. |
| 60 | 724568    | GT-AG | <i>CalpC</i> - Calpain C (Calcium-dependent cysteine-type endopeptidase activity; calcium ion binding)  | Mount et al. |
| 61 | 412191    | GT-AG | <i>dia</i> - Diaphanous (Actin binding; Rho GTPase binding)                                             | Mount et al. |
| 62 | 724655    | GT-AG | <i>Set</i> (cyclin binding)                                                                             | Mount et al. |
| 63 | 552098    | GT-AG | <i>Syx8</i> - Syntaxin 8 (SNAP receptor activity)                                                       | Mount et al. |
| 64 | 551683    | GT-AG | (CG2021) - nuclear mRNA splicing, via spliceosome                                                       | Mount et al. |
| 65 | 100576775 | GT-AG | CG9004 (protein binding)                                                                                | Mount et al. |
| 66 | 551700    | GT-AG | CG4159 (pseudouridylate synthase activity; pseudouridine synthase activity; RNA binding)                | Mount et al. |
| 67 | 726438    | GT-AG | <i>Cep97</i> (protein phosphatase type 1 regulator activity; protein binding)                           | Mount et al. |

|                          |    |         |       |                                                                                                     |              |
|--------------------------|----|---------|-------|-----------------------------------------------------------------------------------------------------|--------------|
|                          | 68 | 412141  | GT-AG | unknown                                                                                             | Mount et al. |
|                          | 69 | 410525  | GT-AG | <i>PrBP</i> - Prenyl-binding protein (3',5'-cyclic-GMP phosphodiesterase activity; protein binding) | Mount et al. |
| <i>Anopheles gambiae</i> | 70 | 1278356 | GT-AG | cg14216 (phosphoprotein phosphatase activity)                                                       | U12DB        |
|                          | 71 | 1277345 | GT-AG | <i>Derlin-2</i> , unknown                                                                           | U12DB        |

**Table S2. Functional categories over-represented in genes containing the U12-type introns in *Insecta*.**

| GO category              | Genes in GO category                                                                                                                                                                                                                                                                                                                                                                                              |
|--------------------------|-------------------------------------------------------------------------------------------------------------------------------------------------------------------------------------------------------------------------------------------------------------------------------------------------------------------------------------------------------------------------------------------------------------------|
| Ion Transport            | FBGN0040297, FBGN0028703, FBGN0026787, FBGN0029846, FBGN0001991, FBGN0039465, FBGN0036141, FBGN0039172, FBGN0030850, FBGN0024921, FBGN0042177                                                                                                                                                                                                                                                                     |
| WD40 repeat-like         | FBGN0030412, FBGN0037135, FBGN0002121, FBGN0004889                                                                                                                                                                                                                                                                                                                                                                |
| Nucleic acid binding     | FBGN0029833, FBGN0037135, FBGN0038464, FBGN0032408, FBGN0025140, FBGN0038811, FBGN0032244, FBGN0032600, FBGN0032940, FBGN0260010, FBGN0004595, FBGN0003308, FBGN0020653, FBGN0001313, FBGN0011817, FBGN0031628, FBGN0260450, FBGN0032059, FBGN0005777, FBGN0023508, FBGN0039172, FBGN0004889, FBGN0031054, FBGN0026379, FBGN0036039, FBGN0031043, FBGN0025455, FBGN0029846, FBGN0085421, FBGN0013954, FBGN0034089 |
| Transcription Regulation | FBGN0020653, FBGN0025455, FBGN0036141, FBGN0001991, FBGN0002121, FBGN0004889, FBGN0004595, FBGN0037135, FBGN0014879, FBGN0032940, FBGN0034795                                                                                                                                                                                                                                                                     |
| Transmembrane            | FBGN0029846, FBGN0039465, FBGN0001991, FBGN0039172, FBGN0040297, FBGN0028703, FBGN0026787, FBGN0030850, FBGN0036141, FBGN0039172, FBGN0002121                                                                                                                                                                                                                                                                     |
| Ion binding              | FBGN0003308, FBGN0031628, FBGN0260450, FBGN0005777, FBGN0032600, FBGN0030873, FBGN0001991, FBGN0085478, FBGN0030096, FBGN0037655, FBGN0026379                                                                                                                                                                                                                                                                     |



|                                 |                                                                                                                                                                                                                                                                                                           |
|---------------------------------|-----------------------------------------------------------------------------------------------------------------------------------------------------------------------------------------------------------------------------------------------------------------------------------------------------------|
| Transferase activity            | FBGN0025455, FBGN0036039, FBGN0085421, FBGN0034089, FBGN0031043, FBGN0011817, FBGN0020653, FBGN0037135, FBGN0001313, FBGN0039172, FBGN0025140, FBGN0031054, FBGN0038811, FBGN0003308, FBGN0032059, FBGN0005777, FBGN0260450, FBGN0032244, FBGN0029846, FBGN0023508, FBGN0013954, FBGN0004889, FBGN0026379 |
| Phosphatase/ Hydrolase activity | FBGN0032059, FBGN0005777, FBGN0023508, FBGN0004889, FBGN0031054, FBGN0026379, FBGN0260450, FBGN0032244, FBGN0037135, FBGN0001313, FBGN0039172, FBGN0025140, FBGN0020653, FBGN0031043, FBGN0036039, FBGN0011817, FBGN0038811, FBGN0003308, FBGN0025455, FBGN0029846, FBGN0085421, FBGN0013954, FBGN0034089 |

**Table S3. Functional categories over-represented in genes containing the U12-type introns only in *Diptera*.**

| GO term              | Genes in GO category                                                                                                                                                    |
|----------------------|-------------------------------------------------------------------------------------------------------------------------------------------------------------------------|
| Ion Transport        | FBGN0029846, FBGN0039465, FBGN0001991, FBGN0028703, FBGN0030850                                                                                                         |
| Transferase          | FBGN0036039, FBGN0029846, FBGN0023508, FBGN0085421, FBGN0011817, BGN0031054                                                                                             |
| Ion binding          | FBGN0030412, FBGN0001991, FBGN0038438, FBGN0031437, FBGN0037655, FBGN0011817, FBGN0004595, FBGN0031628, FBGN0032600, FBGN0023508, FBGN0030364, FBGN0037084, FBGN0038464 |
| Nucleic acid binding | FBGN0031628, FBGN0030412, FBGN0032600, FBGN0023508, FBGN0030364, FBGN0038438, FBGN0031437, FBGN0037084, FBGN0038464, FBGN0001991, FBGN0037655, FBGN0011817, FBGN0004595 |

**Table S4. Total and U12-type intron number in selected genomes.**

| <b>Organism</b>                | <b>Total number of introns</b> | <b>U12-type introns</b> |
|--------------------------------|--------------------------------|-------------------------|
| <i>Apis mellifera</i>          | 54,818                         | 63                      |
| <i>Drosophila melanogaster</i> | 38,539                         | 19                      |
| <i>Anopheles gambiae</i>       | 36,186                         | 17                      |
| <i>A. aegypti</i>              | 41,678                         | 17                      |
| <i>N. vetripennis</i>          | 86,395                         | 46                      |
| <i>Tetraodon nigroviridis</i>  | 187,875                        | 392                     |
| <i>H. sapiens</i>              | 207,344                        | 695                     |
| <i>A. thaliana</i>             | 70,379                         | 309                     |
